# Supplementary material for: Neutralizing Activity against BQ.1.1, BN.1, and XBB.1 in Bivalent COVID-19 Vaccine Recipients: Comparison by the Types of Prior Infection and Vaccine Formulations
Source: MDPI journal article supplement (doi:10.3390/vaccines11081320), 2023-08-04
Supplement: s1 [file s1]

**Table S1.** Comparison of IgG anti-RBD antibodies after bivalent booster: comparison by the presence of prior SARS-CoV-2 infection

|                       | <b>Group 1</b>                    | <b>Group 2</b>                   | <b>Group 3</b>              | <b><i>P</i>-value</b> |                |                |
|-----------------------|-----------------------------------|----------------------------------|-----------------------------|-----------------------|----------------|----------------|
|                       | <b>SARS-CoV-2 infection-naïve</b> | <b>Prior BA.1/BA.2- infected</b> | <b>Prior BA.5- infected</b> | <b>Group 1</b>        | <b>Group 2</b> | <b>Group 3</b> |
|                       | <b>(n = 5)</b>                    | <b>(n = 10)</b>                  | <b>(n = 6)</b>              | <b>vs.</b>            | <b>vs.</b>     | <b>Vs.</b>     |
|                       |                                   |                                  |                             | <b>Group 2</b>        | <b>Group 3</b> | <b>Group 1</b> |
| Pre-bivalent vaccine  | 1650 (607–4484)                   | 9675 (7006–13,360)               | 20,233 (6121–66,881)        | 0.003                 | 0.042          | 0.009          |
| GMT, U/mL             |                                   |                                  |                             |                       |                |                |
| Post-bivalent vaccine | 29,303 (19,129–44,887)            | 39,043 (31,333–48,650)           | 44,762 (28,593–70,075)      | 0.165                 | 0.511          | 0.247          |
| GMT, U/mL             |                                   |                                  |                             |                       |                |                |

Abbreviations: IgG, immunoglobulin G; RBD, receptor binding domain, GMT, geometric mean titer.
